# Supplementary material
Source: publisher site journal article supplement (https://www.dovepress.com/article/510412)
Supplement: Supplementary file 1 [file get_supplementary_file.php]

#### **Supplementary Files**

#### **Supplementary Table 1:** Total number ofconsensusstatements developed after round 2 of the modified Delphi method

| Sl. No. | Consensus statements | Level of evidence | Level of agreement |  |
| --- | --- | --- | --- | --- |
|  | **Epidemiology of sarcopenia** |  |  |  |
| 1. | Among the elderly (≥60 years of age) in India, primary sarcopenia has a prevalence of 39.2%. | 3b | High |  |
| 2. | Osteosarcopenic obesity syndrome has a global prevalence of 6.79% in bedridden patients ≥65 years. | 5 | High |  |
| 3. | The overall prevalence of sarcopenic obesity in India is 8.7%. | 3b | High |  |
| 4. | The prevalence of sarcopenia in individuals with comorbidities such as CVD is 51.4%, diabetes is 44.1%, bone/joint diseases is 49.1%, neurological illness is 45.7%, and multi-morbidities is 45.6%. | 3b | High |  |
|  | **Definition of sarcopenia** |  |  |  |
| 5. | Sarcopenia as a syndrome is defined as a decrease in any two of the following:   - Muscle function - Muscle strength - Muscle mass | 1a | High | EBR |
| 6. | Among Indians, cut-offs for HGS and other parameters are lower than existing definitions; hence, the development of indigenous cut-offs relevant to the Indian population is essential. | 3b | High | EBR |
| 7. | At a cut-off point of 20.0 kgs, HGS has a sensitivity of 70.5% and a specificity of 77.3%. | 3b | High | EBR |
| 8. | Administration of testosterone may improve muscle function in sarcopenic individuals unable to exercise. | 2b | High | EBR |
| 9. | Cut-offs of ASMI <5.4 kg/m2 in women and <7 kg/m2 in men can be considered for the diagnosis of secondary sarcopenia. | 3b | High | EBR |
|  | **Etiopathogenesis of sarcopenia** |  |  |  |
| 10. | Sedentary lifestyle is one of the important contributing factors to sarcopenia in the elderly population. | 1a | High |  |
| 11. | Poor nutritional status impairs immunity and increases the risk of muscle and bone loss. | 2b | High |  |
| 12. | Sarcopenia may both be the cause and consequence of diabetes mellitus, which is indicative of a bidirectional relationship between the two. | 2a | High |  |
| 13. | Chronic low-grade inflammation is associated with various comorbidities such as diabetes mellitus, respiratory diseases, sarcopenic obesity, and heart failure, contributing to skeletal damage and the development of sarcopenia. | 1a | High |  |
| 14. | Sarcopenia in people with COPD leads to low exercise tolerance, poor quality of life, and further deterioration of respiratory function. | 2a/1a | High |  |
|  | **Clinical features and impact of sarcopenia** |  |  |  |
| 15. | Sarcopenia has been recognized as one of the major contributing factors to frailty in older adults. | 1b | High |  |
| 16. | The age-related rate of decline in muscle strength is rapid in Asians compared to other ethnic groups. | 2b | High |  |
| 17. | Normal-weight obesity, a commonly encountered phenotype in South Asia, is associated with a higher risk of sarcopenia. | 3b | High |  |
| 18. | Critically ill patients in the ICU lose approximately 2% of skeletal mass per day in the first week of admission and have a higher risk of mortality. | 1a | High |  |
| 19. | Sarcopenia is associated with poor outcomes in cancer and with an increased risk of complications during cancer. | 1a/1b (reframed) | High |  |
| 20. | Poor outcomes have been associated in COVID-19 patients with sarcopenia due to immune dysfunction, chronic inflammatory state, swallowing dysfunction, and respiratory muscle dysfunction. | 1b | High |  |
|  | **Screening and diagnosis of sarcopenia** |  |  |  |
| 21. | Gait speed, grip strength, and the chair stand test are quick and reliable measures of functional capacity. | 3b | High | PP |
| 22. | A gait speed of 0.8 m/s suggests poor physical performance in adults over 60 years of age. | 2b | High | EBR |
| 23. | The hand-held dynamometer is a reliable and inexpensive device to assess grip strength in clinical practice. | 2b | High | PP |
| 24. | GripBMI can be a valuable tool in the assessment of grip weakness. | 2b | High | EBR |
| 25. | Muscle mass measurement using MUAC or calf circumference highly correlates with BMI and can be used for sarcopenia assessment. | 3b | High | EBR |
| 26. | A variation of two chair stands with a 30-second rest in between can be considered for the assessment of lower limb strength in frail older adults. | 2b | High | EBR |
| 27. | Sarcopenia screening should be undertaken in all patients with comorbidities. | 1a | High | PP |
| 28. | SARC-F can be used as a bedside tool to assess both muscle strength and muscle loss in secondary sarcopenia. | 2b | High | PP |
| 29. | Ultrasound is a reliable and valid alternative for assessing muscle mass in older adults and can be used if other tools are unavailable. | 1a | High | EBR |
| 30. | The rectus femoris as well as the psoas muscles are suitable alternatives for measurements in sarcopenia by USG. | 3a/3b | High | PP |
| 31. | Imaging tests such as CT, MRI, USG, DXA, or BIA may be conducted as per the need and affordability. | 1a | High | EBR |
| 32. | FRAX® may be used for the primary screening of osteoporosis. | 3b | High | EBR |
| 33. | Since poor nutritional status and prognosis in patients with sarcopenia are strongly associated with comorbidities, nutritional assessment must be performed as a part of standard patient care. | 2b | High | CBR |
|  | **Monitoring of sarcopenia** |  |  |  |
| 34. | Commonly used biomarkers of sarcopenia are albumin, total protein, hemoglobin, vitamin D, uric acid, calcium, triglycerides, testosterone and estrogen, CPK, CRP, and ESR. | 1a | High | EBR |
| 35. | Monitoring after diagnosis of sarcopenia should be done at least once in 3–6 months in symptomatic patients. | 1b | High | CBR |
| 36. | Monitoring of sarcopenia can be done by clinical, biochemical, or radiological methods. | 1a | High | EBR |
|  | **Prevention and management of sarcopenia** |  |  |  |
| 37. | A minimum 12-week program of resistance exercise combined with nutritional supplementation can be recommended for the prevention and management of sarcopenia. | 2b | High | EBR |
| 38. | Oral nutritional supplements containing HMB, proteins, and vitamin D lead to improvements in skeletal muscle health in diverse populations. | 1a/2a/2b | High | EBR |
| 39. | Testosterone supplementation can increase muscle mass and grip strength, in addition to improving physical performance, thereby influencing clinical outcomes in sarcopenia. | 1a | Moderate | Guarded CBR |
| 40. | Long-term lifestyle changes that include both nutritional and physical components must be advocated for the prevention and management of sarcopenia. | 1b | High | PP |
| 41. | Interventional thresholds for sarcopenia are at a lower value compared to diagnostic thresholds, emphasizing prevention. | Expert opinion | High | CBR |
| 42. | Measures for the promotion of muscle mass and prevention of sarcopenia should be instituted in healthy persons as well. | 1a | High | EBR |
| 43. | Psychological support and therapy should accompany other interventions to optimize the acceptance of, and adherence to, sarcopenia management. | 1b | High | EB |
|  | **Way forward** |  |  |  |
| 44. | AI models, such as DSnet-v1, can assist in the diagnosis and treatment of sarcopenia. | 2a | High |  |
| 45. | A gap in knowledge exists regarding diagnostic cut-offs for sarcopenia assessment, the role of biomarkers in screening, and overall support strategies for sarcopenia in India. | 1a | High |  |

ASMI: Appendicular skeletal mass index; AI: Artificial intelligence; BIA: Bioelectrical impedance analysis; BMI: Body mass index; COPD: Chronic obstructive pulmonary disease; COVID-19: Coronavirus disease 2019; CPK: Creatine phosphokinase; CRP: C-reactive protein; CT: Computed tomography; CVD: Cardiovascular disease; DXA: Dual-energy X-ray absorptiometry; ESR: Erythrocyte sedimentation rate; FRAX®: Fracture risk assessment tool; HGS: Hand grip strength; HMB: Beta-hydroxy-beta-methylbutyrate; ICU: Intensive care unit; MRI: Magnetic resonance imaging; MUAC: Mid-upper arm circumference; SARC-F: Strength, assistance in walking, rise from a chair, climb stairs, and falls; USG: Ultrasonography.
